# Supplementary material for: Integrating Health Behavior Theories to Predict COVID-19 Vaccine Acceptance: Differences between Medical Students and Nursing Students
Source: MDPI journal article supplement (doi:10.3390/vaccines9070783), 2021-07-13
Supplement: s1 [file s1]

**Table S1. HBM and TPB measures: comparison between medical and nursing students**

(*N*=628). For all variables, except for general health motivation, cues to action and self-efficacy, medical students presented a significantly higher mean value, compared to nursing students.

| Covariates                  |                    | Medical students<br>( <i>N</i> =321) |           | Nursing students<br>( <i>N</i> =307) |           | Total sample<br>( <i>N</i> =628) |           | <i>t</i> value |
|-----------------------------|--------------------|--------------------------------------|-----------|--------------------------------------|-----------|----------------------------------|-----------|----------------|
|                             |                    | <i>M</i>                             | <i>SD</i> | <i>M</i>                             | <i>SD</i> | <i>M</i>                         | <i>SD</i> |                |
| Health Belief Model         | Susceptibility     | 4.22                                 | 1.17      | 3.53                                 | 1.25      | 3.88                             | 1.27      | 7.07**         |
|                             | Severity           | 4.63                                 | 0.86      | 4.41                                 | 0.94      | 4.52                             | 0.91      | 2.99**         |
|                             | Benefits           | 5.18                                 | 0.90      | 4.74                                 | 1.22      | 4.97                             | 1.09      | 5.15**         |
|                             | Barriers           | 2.65                                 | 0.95      | 3.23                                 | 0.97      | 2.94                             | 1.00      | -7.53**        |
|                             | Health Motivation  | 5.23                                 | 1.02      | 5.16                                 | 0.98      | 5.20                             | 1.00      | .80            |
|                             | Cues to action     | 3.73                                 | 1.26      | 3.79                                 | 1.32      | 3.76                             | 1.29      | -.53           |
| Theory of Planned Behaviour | Attitude           | 4.79                                 | 1.32      | 4.47                                 | 1.53      | 4.64                             | 1.44      | 2.82**         |
|                             | Subjective norms   | 5.18                                 | 1.03      | 4.55                                 | 1.35      | 4.88                             | 1.24      | 6.55**         |
|                             | Self-efficacy      | 4.48                                 | 0.95      | 4.34                                 | 0.97      | 4.42                             | 0.97      | 1.78           |
|                             | Anticipated regret | 4.48                                 | 0.95      | 4.34                                 | 0.97      | 4.10                             | 1.60      | 3.79**         |

\*\**p*<.01.
